# Supplementary material
Source: publisher figshare collection journal article supplement (https://acs.figshare.com/ndownloader/files/13382981)
Supplement: Supplementary file 1 [file 13382981]

# Supporting Information

## Chemical Synthesis of $K_2S_2$ and $K_2S_3$ for Probing Electrochemical Mechanisms in K-S Batteries

*Sichen Gu<sup>a,b</sup>, Neng Xiao<sup>b</sup>, Feng Wu<sup>a,c</sup>, Ying Bai<sup>a\*</sup>, Chuan Wu<sup>a,c\*</sup>, Yiyang Wu<sup>b\*</sup>*

<sup>a</sup> School of Materials Science and Engineering, Beijing Institute of Technology, Beijing 100081, PR China

<sup>b</sup> Department of Chemistry & Biochemistry, The Ohio State University 100 West 18th Avenue, Columbus, OH 43210, USA

<sup>c</sup> Collaborative Innovation Center of Electric Vehicles in Beijing, Beijing 100081, PR China

### AUTHOR INFORMATION

#### Corresponding Author

\*E-mail: YB: [membrane@bit.edu.cn](mailto:membrane@bit.edu.cn); CW: [chuanwu@bit.edu.cn](mailto:chuanwu@bit.edu.cn); YW:

[wu@chemistry.ohio-state.edu](mailto:wu@chemistry.ohio-state.edu)

## 1. Experimental section

### 1.1 Synthesis of $K_2S_2$ , $K_2S_3$ and $K_2S_5$

The  $K_2S_3$  were synthesized by the method of precipitation. The K (sigma) and sublime sulfur (Alfa Aesar) were weighted at a mole ratio of 2:3 and added into DME. The K and sulfur were stirred overnight under the protection of argon. The DME was evaporated and the precipitates were collected. The  $K_2S_2$  were synthesized by mixing as-prepared  $K_2S_3$  and  $K_2S$  (Sterm Chemical, Inc.) with 1:1 mole ratio and placed in quartz tube. The tube was flame-sealed under vacuum and maintained at 285°C for 48 h. Then the tube was removed from the furnace and taken into argon filled glove box for collection of  $K_2S_2$ . The  $K_2S_5$  were synthesized by mixing as-prepared  $K_2S_3$  and sublime sulfur with 1:2 mole ratio in quartz tube, flame-sealed and maintained at 196 °C for 40 h. The  $K_2S_4$  and  $K_2S_6$  were attempted to be synthesized but failed.

### 1.2 Characterization of potassium polysulfide

$K_2S$ ,  $K_2S_2$  and  $K_2S_3$  were characterized by X-ray diffractometer (Bruker D8 Advance, Cu-K $\alpha$  source, 40 kV, 50 mA). A polymer thermoplastic sealant (3M Company) was applied to seal the XRD holder against the ambient air. UV-vis (Lambda 950 Spectrometer, PerkinElmer) analysis were used to characterize the soluble polysulfide species in DME or electrolytes.

The solubility of  $K_2S_2$  and  $K_2S_3$  in DME were determined by the following experiments: 200 mg  $K_2S_2$  or  $K_2S_3$  was added into 10 mL DME to get a saturated solution and stirred in

room temperature for 12 h. The suspension were filtered by filter (thermos scientific Titan3, 45  $\mu\text{m}$ ) to get transparent soluble phase. Then the DME was evaporated and the residues were collected and weighted.

### 1.3 Synthesis of the 70S/30CNT composites

The cathode materials consist of multiwalled carbon nanotube (Cheap Tubes Inc.) and sulfur, which abbreviated as 70S/30CNT, were fabricated through a melt-diffusion method. In a typical experiment, 0.7g sublimed sulfur and 0.3 g carbon nanotube were weighted and ground homogeneously in a mortar. The mixture was put into a hydrothermal reactor, under the protection of argon. Then, the composites were heated to 160  $^{\circ}\text{C}$  at a rate of 50  $^{\circ}\text{C min}^{-1}$ . The temperature was maintained for 12 h. The 70S/30CNT composite was obtained after natural cooling.

### 1.4 Assembly of K-S cells

The Nafion- $\text{K}^{+}$  membrane was firstly prepared using a previously reported method<sup>1</sup>. To exchange the original cation ( $\text{H}^{+}$ ) of Nafion to  $\text{K}^{+}$ , Nafion 211 membranes (25  $\mu\text{m}$  thickness, Dupont) were heated in a 0.5 M KOH solution of dimethylsulfoxide (DMSO) (> 99.99 %, Sigma-Aldrich) and water (volume ratio=1:1) at 60  $^{\circ}\text{C}$  for 2 h. The residual solvent and KOH were removed by stirring the membrane in distilled water at 90  $^{\circ}\text{C}$  for 2 h. The Nafion- $\text{K}^{+}$  membrane were dried under vacuum at 100  $^{\circ}\text{C}$  overnight and then soaked for 12 h in the battery electrolyte before use.

The potassium bis(fluorosulfonyl)imide (KFSI) (> 99.9 %, water content < 50 ppm, Fluolyte) were dried under high vacuum at 100  $^{\circ}\text{C}$  for 48 h prior to use. 1,2-

dimethoxyethane (DME) (BASF) was stored over 3 Å molecular sieves (Sigma-Aldrich). The electrolyte of KFSI/DME (0.5 mr, 0.6 mr) were prepared by mixing KFSI and DME with the salt/solvent mole ratios of 0.5 or 0.6.

The cathodes were fabricated by mixing the carbon nanotube/sulfur,  $K_2S_3$ ,  $K_2S_2$  or  $K_2S$ , Super P carbon powder (MTI Corporation) and poly(vinylidene fluoride) (PVDF) (Sigma-Aldrich) at a weight ratio of 70:20:10 in N-methylpyrrolidone (Sigma-Aldrich). The slurry was then pasted onto the Al foil (99.99%, Alfa Aesar) and dried at 60 °C for 12 h under vacuum (for carbon nanotube cathode) or room temperature for 48 h under argon protection (for  $K_2S$ ,  $K_2S_2$ ,  $K_2S_3$  cathode). The loading weight of sulfur was 1.29 mg ( $0.478 \text{ mg cm}^{-2}$ ) per electrode. The loading weight of  $K_2S_n$  ( $n=1,2,3$ ) was 1.0-1.5 mg ( $1 \text{ mg cm}^{-2}$ - $0.85 \text{ mg cm}^{-2}$ ) per electrode. The coin cells were fabricated in Argon-filled glovebox ( $< 0.5 \text{ ppm}$  of  $H_2O$  and  $< 1.0 \text{ ppm}$  of  $O_2$ ) by stacking potassium metal anode (99.5 %, Sigma-Aldrich), trilayer (polypropylene-polyethylene-polypropylene) membrane (25  $\mu\text{m}$  thickness, Celgard), Nafion- $K^+$  membrane, commercial carbon paper (H2315, Freudenberg FCCT SE & Co. KG), cathode electrode and adding 80  $\mu\text{L}$  KFSI-DME (0.5 mr). The electrolyte/sulfur ratio was  $62.0 \text{ mg } \mu\text{L}^{-1}$ . The commercial carbon paper was used as the upper current collector<sup>2</sup>.

The double separators coin cells were fabricated by stacking potassium metal anode, Celgard, Nafion- $K^+$  membrane, cathode electrode, Celgard, commercial carbon paper.

### 1.5 Electrochemical measurement of K-S cells

Galvanostatic charge and discharge tests and galvanostatic intermittent titration

technique (GITT) tests were carried out using a MTI battery analyzer (BST8-WA) within the voltage range of 1.2-3.0 V (vs K<sup>+</sup>/K).

#### 1.6 Chemical reactivity of KSFI salt

The chemical stability of KFSI salt is studied by the following experiments and NMR.

(1) The KFSI salt was mixed with the methanol-D. (2) The KFSI and K<sub>2</sub>S<sub>3</sub> were dissolved in DME. (3) The KFSI salt (82 mg) was mixed with K<sub>2</sub>S<sub>3</sub> (32.5 mg) in DME solvent (2.5 mL), 18-Crown-6 (200 mg) was added to promote the dissolution of K<sub>2</sub>S<sub>3</sub> (mole ration of KFSI/K<sub>2</sub>S<sub>3</sub>/18C6=1/0.5/2). The results are summarized in Figure S2.

NMR 19F NMR were carried out on a 400 MHz NMR spectrometer (Bruker, Avance III) after mixing 50 uL soluble phase mentioned above into 450 uL MethonalD (99.9 atom % D, Sigma-Aldrich).

#### Reference:

(1) Ren, X.; Lau, K. C.; Yu, M.; Bi, X.; Kreidler, E.; Curtiss, L. A.; Wu, Y. Understanding side reactions in K-O<sub>2</sub> batteries for improved cycle life. *ACS Appl. Mater. Interfaces* **2014**, *6*, 19299-19307.

(2) Su, Y. S.; Manthiram, A. Lithium-Sulphur Batteries with a Microporous Carbon Paper as a Bifunctional Interlayer. *Nat. Commun.* **2012**, *3*, 1166.

(3) Zhao, Q.; Hu, Y.; Zhang, K.; Chen, J. Potassium-Sulfur Batteries: A New Member of Room-Temperature Rechargeable Metal-Sulfur Batteries. *Inorg. Chem.* **2014**, *53*, 9000-

9005.

(4) Lu, X.; Bowden, M. E.; Sprenkle, V. L.; Liu, J. A Low Cost, High Energy Density, and Long Cycle Life Potassium-Sulfur Battery for Grid-Scale Energy Storage. *Adv. Mater.* **2015**, *27*, 5915-5922.

(5) Hwang, J.-Y.; Kim, H.-M.; Yoon, C. S.; Sun, Y.-K. Towards High-safety Potassium-Sulfur Battery Using Potassium Polysulfide Catholyte and Metal-free Anode. *ACS Energy Lett.* **2018**, 540-541.

(6) Yu, X.; Manthiram, A. A Reversible Nonaqueous Room-Temperature Potassium-Sulfur Chemistry for Electrochemical Energy Storage. *Energy Storage Materials* **2018**, *15*, 368-373.

(7) Xiao, N.; Gourdin, G.; Wu, Y. Simultaneous Stabilization of Potassium Metal and Superoxide in K-O<sub>2</sub> Batteries on the Basis of Electrolyte Reactivity. *Angew. Chem. Int. Ed.* **2018**, *57*, 1-5.

Supporting Information:

**Table S1.** Electrochemical performance of reported K-S batteries

| Cathode materials                                                                                           | Electrolyte                                                | Capacity/<br>mAh g <sup>-1</sup> | Discharge<br>plateaus/V | Discharge<br>product                                             |
|-------------------------------------------------------------------------------------------------------------|------------------------------------------------------------|----------------------------------|-------------------------|------------------------------------------------------------------|
| polyaniline coated ordered<br>mesoporous carbon/sulfur <sup>3</sup>                                         | 1 M KClO <sub>4</sub><br>/TEGDME                           | 512.7                            | 1.8, 1.66               | K <sub>2</sub> S <sub>3</sub>                                    |
| Catholyte: 1.5 M KTFSI or<br>KPF <sub>6</sub> /tetraglyme<br>/K <sub>2</sub> S <sub>1.52</sub> <sup>4</sup> | β''-Al <sub>2</sub> O <sub>3</sub><br>solid<br>electrolyte | 402                              | 2.1                     | K <sub>2</sub> S <sub>2</sub> ,<br>K <sub>2</sub> S <sub>3</sub> |
| 3-dimensional freestanding<br>carbon nanotube+ K <sub>2</sub> S <sub>x</sub><br>catholyte <sup>5</sup>      | 0.5 M KTFSI<br>/DEGDME                                     | 400                              | 2.1, 1.8                | K <sub>2</sub> S <sub>3</sub>                                    |
| Sulfur-carbon nanotube<br>fiber <sup>6</sup>                                                                | 1 M<br>KCF <sub>3</sub> SO <sub>3</sub><br>/TEGDME         | 1144                             | 1.95,<br>1.4            | K <sub>2</sub> S                                                 |

**Table S2.** Theoretical capacities of sulfur battery

| Discharge | Number of electrons involved in | Theoretical capacity |
|-----------|---------------------------------|----------------------|
|-----------|---------------------------------|----------------------|

| products | charge transfer per sulfur ( $e^-$ ) | (mAh $g^{-1}$ ) |
|----------|--------------------------------------|-----------------|
| $K_2S_6$ | 1/3                                  | 279.2           |
| $K_2S_5$ | 2/5                                  | 335.0           |
| $K_2S_4$ | 1/2                                  | 418.8           |
| $K_2S_3$ | 2/3                                  | 558.3           |
| $K_2S_2$ | 1                                    | 837.5           |
| $K_2S$   | 2                                    | 1675.0          |

The theoretical discharge capacities are calculated according to the equation  $C=nF/3.6M$ , where  $n$  is the number of electrons involved in the charge transfer,  $F$  is the Faraday constant,  $M$  is the formula weight of sulfur.

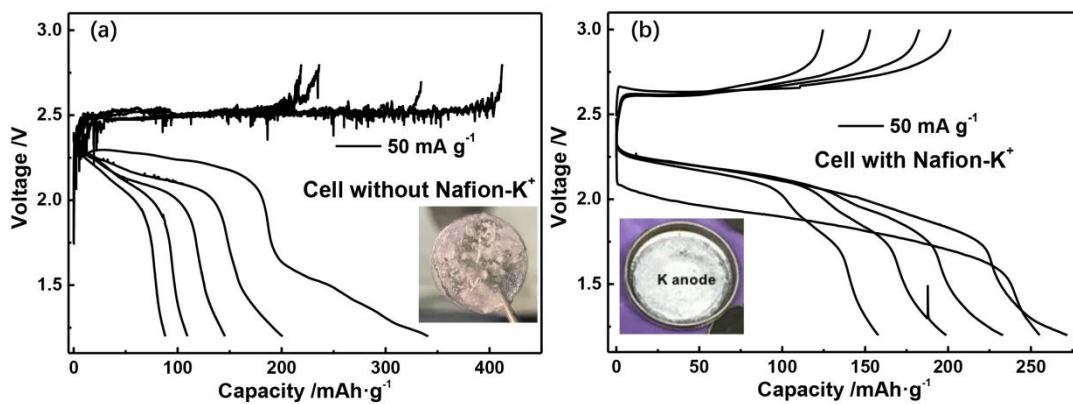



**Figure S1.** Galvanostatic profile of cell without Nafion-K<sup>+</sup> (a) or with Nafion-K<sup>+</sup> (b), Inset: the K anode after cycling.

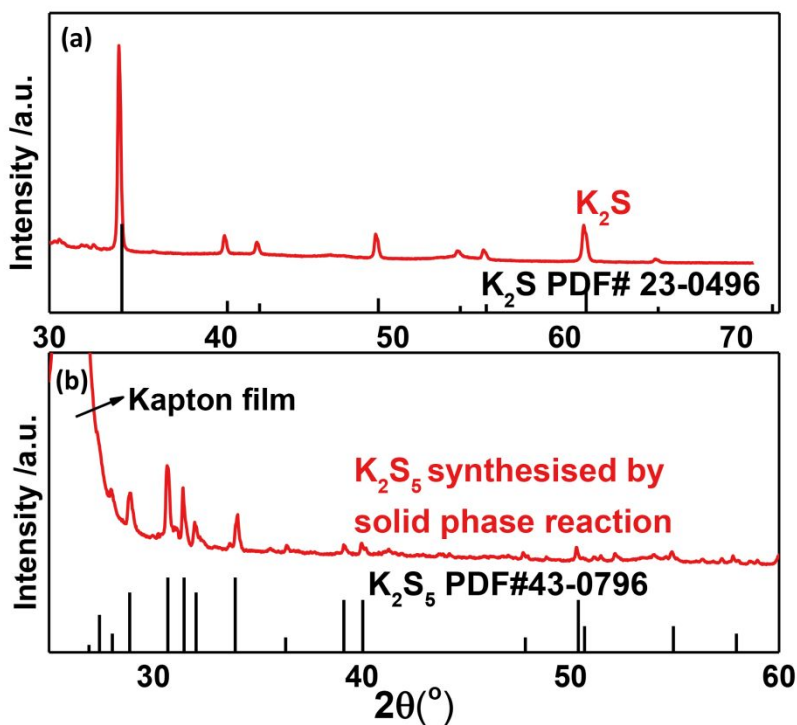

**Figure S2.** XRD characterization of commercially available  $K_2S$  (a) and as-prepared  $K_2S_5$  (b).

NMR was used to investigate the side reaction between the  $K_2S_3$  and KFSI-DME, the 18C6 was used to coordinate KF that could be generated by the side reaction between the KFSI and  $K_2S_3$ . The amount of 18C6 was designed to be enough to coordinate all the K species, so the KF can be released into the solution and detected by NMR<sup>7</sup>.

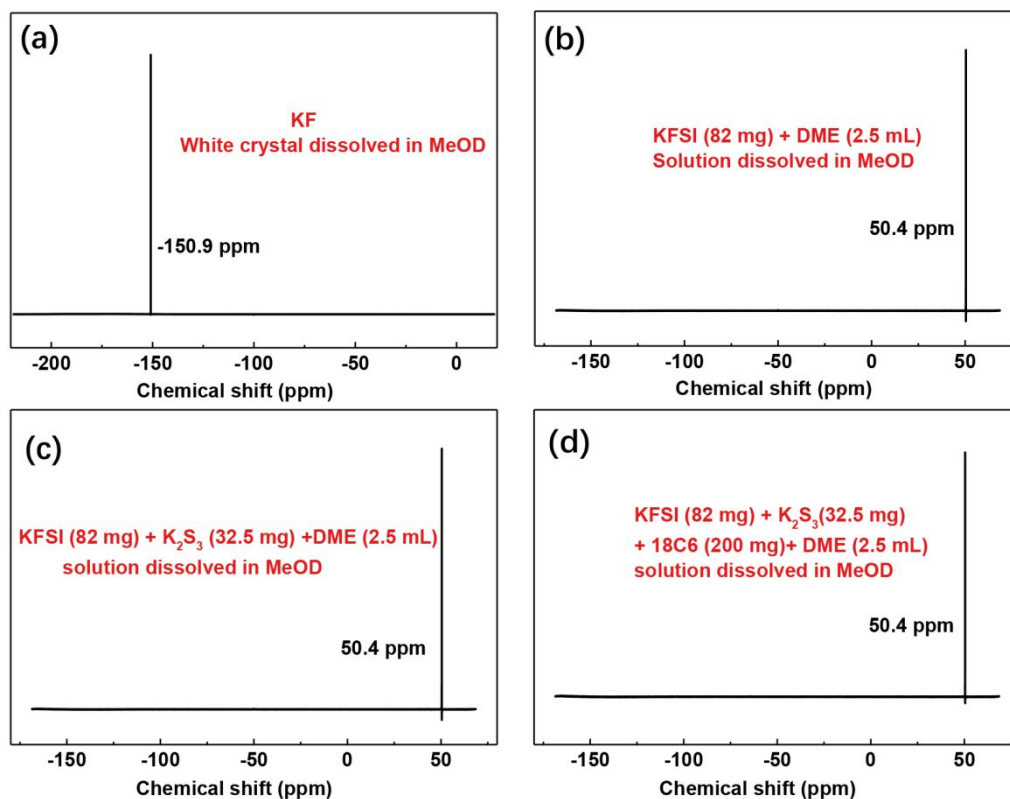

**Figure S3.** The  $^{19}\text{F}$  NMR spectrum of (a) KF dissolved in MeOD, (b) pure 0.5 M KFSI-DME electrolyte, (c) supernatant from mixture of  $\text{K}_2\text{S}_3$  and KFSI-DME electrolyte, (d) supernatant from mixture of  $\text{K}_2\text{S}_3$ , 18C6 and 0.5 M KFSI-DME electrolyte.

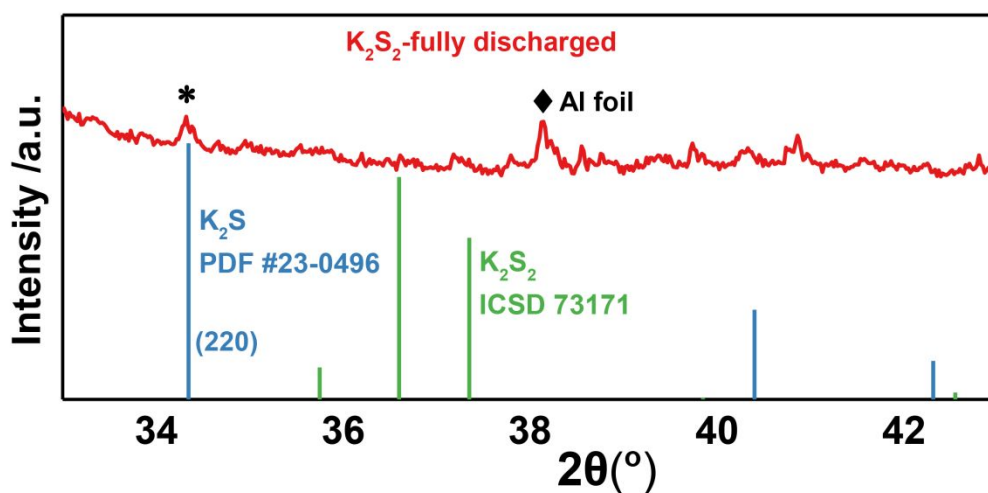

Figure S4. XRD characterization of fully discharged  $\text{K}_2\text{S}_2$  cathode, the star and diamond indicate the peaks of  $\text{K}_2\text{S}_2$  and Al foil (current collector).
